# Supplementary material for: Sodium Ferrous Citrate and 5-Aminolevulinic Acid Exert a Therapeutic Effect on Endotoxin-Induced Uveitis in Rats
Source: MDPI journal article supplement (doi:10.3390/ijms241713525), 2023-08-31
Supplement: s1 [file s1]

**Supplementary Table S1.** Effect of a low dose of 5-Aminolevulinic acid (ALA)/sodium ferrous citrate (SFC) on endotoxin-induced uveitis (EIU)

| Group                                     | Clinical scores | Number of infiltrating cells in AqH<br>(× 10 <sup>5</sup> cells/ml <sup>-1</sup> ) | Protein concentration in AqH<br>(mg/ml <sup>-1</sup> ) |
|-------------------------------------------|-----------------|------------------------------------------------------------------------------------|--------------------------------------------------------|
| ALA/SFC<br>(10/15.7 mg/kg <sup>-1</sup> ) | 2.8 ± 0.45      | 8.1 ± 2.66                                                                         | 29.44 ± 6.36                                           |

Each value represents the mean ± SD (n = 5). ALA: 5-Aminolevulinic acid; AqH: aqueous humor; EIU: endotoxin-induced uveitis; LPS: lipopolysaccharide; Pred: prednisolone; SFC: sodium ferrous citrate.
